# Supplementary material for: Neonatal neurodevelopmental follow-up in the UK: a survey of current practice and future recommendations
Source: Research Square preprint supplement (doi:10.21203/rs.3.rs-6464137/v1), 2025-05-07
Supplement: Supplementary file 1 [file 3d4d7bd410e076cf8385030e.pdf]

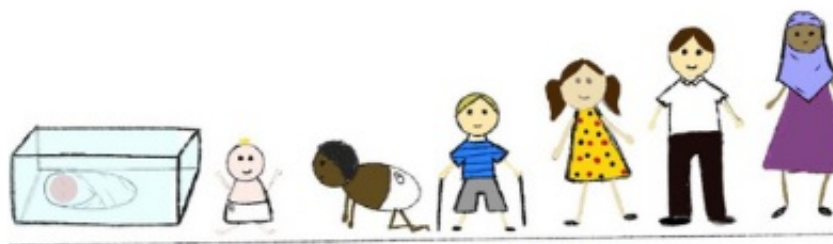

# BANNFU

British Association for Neonatal  
Neurodevelopmental Follow-Up

## UK Neonatal Developmental Follow-up Survey

---

### Survey Information

Dear Colleague

The British Association for Neonatal Neurodevelopmental Follow up Clinical Service Provision workstream (BANNFU-CSP), and the Neonatal Operational Delivery Network (ODN) Lead Physiotherapists, including representatives from Scotland, Wales and Northern Ireland are collaborating to:

1. Find out about current clinical service provision for neonatal neurodevelopmental follow-up services in the UK

2. Inform a UK database of staff and service provision
3. Identify channels of communication within and between neurodevelopmental services
4. Support ODN teams to inform parents more reliably about services offered after they have been discharged home

You have been identified as either the Clinical Lead or Developmental Follow-up Lead for your neonatal unit and we are inviting you to participate in this survey about neonatal developmental follow-up care.

**The survey questions are answered by tick box, and will take less than 10 minutes to complete.**

In the survey, you will be asked about the services your unit offers regarding neonatal follow-up, including specific time points for appointments, duration of follow-up, who is involved and identification of tools that you might use to assess developmental progress.

**Even if you are not able to offer a developmental follow-up service, it is still appropriate and important for you to participate.**

The BANNFU CSP workstream will have access to the full dataset and the Lead AHPs from each ODN will have access to the data for the neonatal units within their specific ODN. All data will be stored on a secure, password protected NHS server or device.

Data will be reported at BAPM and National Neonatal Audit Programme (NNAP) events and, a full **anonymised** dataset will be written up for publication in a peer reviewed clinical journal. Anonymised data may also be included in a PhD thesis. You will be asked for your consent for this at the end of the survey.

Thank you for your time. If you have any queries then please do not hesitate to contact us using the details below.

Kind Regards

**Dr A Huertas-Ceballos, Consultant Neonatologist UCL and BANNFU President**

Contact: a.huertas-ceballos@nhs.net

**Ms Claire Marcroft, Neonatal Physiotherapist and Northern Neonatal Network ODN Physiotherapy Lead and NIHR Clinical Doctoral Research Fellow**

Contact: c.marcroft@nhs.net

**Ms Hilary Cruikshank, Clinical Specialist Neonatal Physiotherapist, BAPM AHP Lead**

Contact: [hilary.cruickshank@nhslothian.scot.nhs.uk](mailto:hilary.cruickshank@nhslothian.scot.nhs.uk)

# Participant and Neonatal Unit Information

**1. What is your profession/job role? Please select from choices below.**

**1.a. If you selected Other, please specify:**

**2. Which Neonatal Operational Delivery Network does your service relate to?  
Please select corresponding network.**

**2.a. Please select your neonatal unit name.**

- ☐ Borders General Hospital, Melrose
- ☐ Dumfries and Galloway Royal Infirmary
- ☐ Simpson Centre for Reproductive Health, Edinburgh
- ☐ St John's Hospital, Livingston
- ☐ Wishaw General Hospital
- ☐ Ayrshire Maternity Unit,
- ☐ Royal Alexandra Hospital, Paisley
- ☐ Royal Hospital for Children, Glasgow
- ☐ Princess Royal Maternity Hospital, Glasgow
- ☐ Forth Valley Royal Hospital
- ☐ Victoria Hospital, Fife
- ☐ Ninewells Hospital, Dundee
- ☐ Aberdeen Maternity Hospital

- ☐ Dr Gray's Hospital, Moray
- ☐ Raigmore Hospital, Inverness
- ☐ Community Service not directly linked to one specific neonatal unit
- ☐ Other

2.a.i. If you selected Other, please specify:

2.a.ii. What is your service called? What areas/post-codes/neonatal units do you cover?

2.b. Please select your neonatal unit name.

- ☐ Medway Maritime (Oliver Fisher)
- ☐ William Harvey Hospital
- ☐ Ashford and St Peters Hospital
- ☐ Royal Sussex County Hospital
- ☐ Queen Elizabeth, The Queen Mother Hospital
- ☐ Princess Royal Hospital
- ☐ Firmley Park Hospital
- ☐ East Surrey Hospital
- ☐ Penbury Hospital, Tunbridge Wells
- ☐ Darent Valley Hospital
- ☐ Worthing Hospital
- ☐ Conquest Hospital

- ☐ Royal Surrey County Hospital
- ☐ Community Service not directly linked to one specific neonatal unit
- ☐ Other

**2.b.i.** If you selected Other, please specify:

**2.b.ii.** What is your service called? What areas/post-codes/neonatal units does your service cover?

**2.c.** Please select your neonatal unit name.

- ☐ Royal Jubilee Maternity Hospital (Belfast)
- ☐ Ulster Hospital
- ☐ Craigavon Area Hospital
- ☐ Antrim Hospital
- ☐ Altnagelvin Hospital
- ☐ Community Service not directly linked to one specific neonatal unit
- ☐ Other

**2.c.i.** If you selected Other, please specify:

**2.c.ii.** What is your service called? What area/post-code/neonatal units do you cover?

2.d. Please select your neonatal unit name.

- ☐ St Michael's Hospital, Bristol
- ☐ South Mead Hospital
- ☐ Derriford Hospital
- ☐ Gloucester Royal Hospital
- ☐ Royal United Hospital
- ☐ Great Western Hospital
- ☐ Musgrave Park Hospital
- ☐ Royal Devon and Exeter Hospital
- ☐ Royal Cornwall Hospital
- ☐ Yeovil Hospital
- ☐ North Devon District Hospital
- ☐ Torbay Hospital
- ☐ Community service not directly linked to one specific neonatal unit
- ☐ Other

2.d.i. If you selected Other, please specify:

2.d.ii. What is your service called? Which areas/post-codes/neonatal units do you cover?

2.e. Please select your neonatal unit name.

- ☐ Singleton Hospital, Swansea Bay
- ☐ University Hospital of Wales, Cardiff
- ☐ The Grange Hospital, Anuerin Bevan
- ☐ Ysbyty Glan Clwyd Hospital, Betsi Cadwaladr
- ☐ Prince Charles Hospital, Cwm Taf Morgannwg
- ☐ Prince of Wales Hospital, Cwm Taf Morgannwg
- ☐ Glangwili Hospital, Hywel Dda
- ☐ Ysbyty Gwynedd Hospital, Betsi Cadwaladr
- ☐ Wrexham Maelor Hospital, Betsi Cadwaladr
- ☐ Community Service not directly linked to one specific neonatal unit
- ☐ Other

2.e.i. If you selected Other, please specify:

2.e.ii. What is your service called? What area/post-codes/neonatal units do you cover?

2.f. Please select your neonatal unit name.

- ☐ Pilgrim Hospital, Boston
- ☐ Royal Derby Hospital
- ☐ Lincoln County Hospital
- ☐ Kings Mill Hospital
- ☐ Nottingham City Hospital
- ☐ Queens Medical Centre, Nottingham



- ☐ Queens Hospital, Burton
- ☐ Kettering General Hospital
- ☐ Leicester General Hospital
- ☐ Leicester Royal Infirmary
- ☐ Northampton General Hospital
- ☐ Community service not linked directly to a specific neonatal unit
- ☐ Other

**2.f.i.** If you selected Other, please specify:

**2.f.ii.** What is your service called? What areas/post-codes/neonatal units does your service cover?

**2.g.** Please select your neonatal unit/hospital name.

- ☐ St Mary's Hospital, Manchester
- ☐ Royal Bolton Hospital
- ☐ Royal Oldham Hospital
- ☐ North Manchester General Hospital
- ☐ Royal Albert and Edward Hospital
- ☐ Tameside General Hospital
- ☐ Wythenshaw Hospital
- ☐ Arrow Park Hospital
- ☐ Liverpool Women's Hospital
- ☐ Countess of Chester Hospital
- ☐ Macclesfield District General Hospital

- ☐ Ormskirk district General Hospital
- ☐ Warrington Hospital
- ☐ Whiston Hospital
- ☐ Burnley General Teaching Hospital
- ☐ Royal Preston Hospital
- ☐ Blackpool Victoria Hospital
- ☐ Royal Lancaster Infirmary
- ☐ Furness General Hospital
- ☐ Community Service not directly linked to a specific neonatal unit
- ☐ Other

**2.g.i.** If you selected Other, please specify:

**2.g.ii.** What is your service called? What area/post-codes/neonatal units does your service cover?

**2.h.** Please select your neonatal unit name.

- ☐ Luton and Dunstable Hospital
- ☐ Addenbrookes Hospital
- ☐ Norfolk and Norwich Hospital
- ☐ Bedford Hospital
- ☐ Watford Hospital
- ☐ Lister Hospital
- ☐ Harlow (Princess Alexandra) Hospital
- ☐ Colchester Hospital

- ☐ Broomfield Hospital
- ☐ Peterborough Hospital
- ☐ Hinchingbrooke Hospital
- ☐ West Suffolk Hospital
- ☐ James Paget Hospital
- ☐ Ipswich Hospital
- ☐ Queen Elizabeth Hospital
- ☐ Basildon Hospital
- ☐ Southend Hospital
- ☐ Community service not directly linked to a specific neonatal unit
- ☐ Other

**2.h.i.** If you selected Other, please specify:

**2.h.ii.** What is your service called? What area/post-codes/neonatal units does your service cover?

**2.i.** Please select your neonatal unit name.

- ☐ Birmingham Women's Hospital
- ☐ Birmingham Heartlands Hospital
- ☐ New Cross Hospital, Wolverhampton
- ☐ University Hospital Coventry and Warwickshire
- ☐ Birmingham's Children's Surgical Unit
- ☐ Princess Royal Telford
- ☐ Walsall Manor Hospital

- ☐ Russels Hall Hospital
- ☐ Birmingham City Hospital
- ☐ Worcester Royal Hospital
- ☐ Birmingham Good Hope Hospital
- ☐ Warwick Hospital
- ☐ George Elliot (Nuneaton)
- ☐ Hereford County Hospital
- ☐ Community service not directly linked to one specific neonatal unit
- ☐ Other

2.i.i. If you selected Other, please specify:

2.i.ii. What is your service called? What area/post-codes/neonatal units does your service cover?

2.j. Please select your neonatal unit

- ☐ Barnsley Hospital
- ☐ Doncaster Royal Infirmary
- ☐ Leeds General Infirmary
- ☐ Jessop's Hospital, Sheffield
- ☐ Airedale Hospital
- ☐ Calderdale and Huddersfield Hospital
- ☐ Hull Royal Infirmary
- ☐ Scarborough Hospital
- ☐ York Hospital

- ☐ Harrogate District Hospital
- ☐ St James Hospital, Leeds
- ☐ Doncaster and Bassetlaw Hospitals
- ☐ Chesterfield Royal Infirmary
- ☐ Rotherham Hospital
- ☐ Scunthorpe General Hospital
- ☐ Diana Princess of Wales Hospital, Grimsby
- ☐ Bradford Teaching Hospitals
- ☐ Pinderfields Hospital
- ☐ Community service not directly linked to one specific neonatal unit
- ☐ Other

2.j.i. If you selected Other, please specify:

2.j.ii. What is your service called? What area/post-codes/neonatal units does your service cover?

2.k. Please select your neonatal unit name.

- ☐ John Radcliffe Hospital, Oxford
- ☐ Queen Alexandra Hospital, Portsmouth
- ☐ Princess Anne Hospital, Southampton
- ☐ North Hampshire Hospital, Basingstoke
- ☐ Royal Hampshire County Hospital, Hampshire
- ☐ Poole Hospital
- ☐ Stoke Mandeville Hospital, Aylesbury

- ☐ Milton Keynes Hospital
- ☐ Royal Berkshire Hospital, Reading
- ☐ Wrexham Park Hospital, Slough
- ☐ Salisbury Hospital
- ☐ St Richard's Hospital, Chichester
- ☐ Dorset County Hospital, Dorchester
- ☐ St Mary's Hospital, IOW
- ☐ Community service not directly linked to one specific neonatal unit
- ☐ Other

**2.k.i.** If you selected Other, please specify:

**2.k.ii.** What is your service called? What area/post-codes/neonatal units does your service cover?

**2.l.** Please select your neonatal unit name.

- ☐ Royal Victoria Infirmary, Newcastle
- ☐ Darlington Memorial Hospital
- ☐ University Hospital North Durham
- ☐ University Hospital North Tees
- ☐ James Cook University Hospital
- ☐ Queen Elizabeth Hospital (Gateshead)
- ☐ Cumberland Infirmary
- ☐ West Cumberland Infirmary
- ☐ Sunderland Royal Hospital

- ☐ Community Service not directly linked to one specific neonatal unit
- ☐ Other
- ☐ Northumbria Specialist Emergency Care Hospital

2.l.i. If you selected Other, please specify:

2.l.ii. What is your service called? Which area/post-codes/neonatal units does your service cover?

2.m. Please select your neonatal unit name

- ☐ Kings College Hospital
- ☐ St George's Hospital
- ☐ Evelina/St Thomas's Hospital
- ☐ Queen Charlotte's Hospital
- ☐ Chelsea and Westminster Hospital
- ☐ University College Hospital
- ☐ The Royal London Hospital
- ☐ Homerton Hospital
- ☐ Great Ormond Street Hospital
- ☐ University Hospital Lewisham
- ☐ Queen Elizabeth Hospital, Woolwich
- ☐ Croydon University Hospital
- ☐ Kingston Hospital
- ☐ St Helier Hospital
- ☐ St Mary's Hospital

- ☐ Northwick Park
- ☐ Hillingdon Hospital
- ☐ Newham Hospital
- ☐ Whipps Cross Hospital
- ☐ Barnett Hospital
- ☐ Queen Hospital, Romford
- ☐ North Middlesex Hospital
- ☐ Whittington Hospital
- ☐ Princess Royal University Hospital
- ☐ Epsom Hospital
- ☐ West Middlesex Hospital
- ☐ The Royal Free Hospital
- ☐ Community service not directly linked to one specific neonatal unit
- ☐ Other

**2.m.i.** If you selected Other, please specify:

**2.m.ii.** What is your service called? Which area/post-codes/neonatal units does your service cover?

**3.** Please identify your neonatal unit classification?

- ☐ Level 3 - Neonatal Intensive Care Unit
- ☐ Level 2 - Local Neonatal Unit



- ☐ Level 1 - Special Care Baby Unit
- ☐ Community Service not linked to one specific neonatal unit
- ☐ Other

3.a. If you selected Other, please specify:

# Discharge home from hospital

4. Are parents/caregivers provided with a written discharge summary regarding the medical care their child has received prior to being discharged home from the neonatal unit?

☐ Yes

☐ No

5. Does a clinical member of staff go through the discharge summary/letter with the parents/caregivers prior to discharge home to check for accuracy and understanding?

☐ Yes

☐ No

☐ Sometimes

5.a. If you answered no, or sometimes, what are the reasons for this?

5.b. Does the discharge summary/letter include tailored information regarding the following? Please tick all that are included.

☐ Risk factors for potential developmental problems

☐ Information about newborn hearing screening

☐ The name and contact details for Health Visitor

☐ Plans for follow-up arrangements

☐ Sign-posting to opportunities for peer support services/groups

☐ Sign-posting to local support services

- ☐ Advice for them to contact the GP/Health Visitor if they have any future concerns about the child's developmental abilities.

6. Are parents/caregivers provided with a **single point of contact** for outreach care after discharge home from the neonatal unit?

- ☐ Yes, we have a specific outreach or discharge home transition team
- ☐ We do not have a specific outreach or discharge team, but parents are provided with the neonatal unit telephone number
- ☐ We do not have a specific outreach or discharge team but parents are provided with a specific contact for the paediatric community team
- ☐ No, we do not provide a single point of contact at discharge
- ☐ Other

6.a. If you selected Other, please specify:

7. Does your service offer a routine (general) neonatal follow-up service (not specifically for assessment of developmental abilities) for infants who have received care on your neonatal unit?

- ☐ Yes
- ☐ No

8. Do you use any remote digital or virtual services for neonatal follow-up?

☐ Yes

☐ No

**8.a.** Why do you not use a remote digital service? Please tick all that apply.

- ☐ We have subscribed but don't use it yet
- ☐ Families preferred to see us face to face
- ☐ We don't think families would use it
- ☐ It's expensive
- ☐ We are interested in using a digital service but have not had the opportunity to explore this
- ☐ We don't have the administration support to use a digital service
- ☐ Other

**8.a.i.** If you selected Other, please specify:

**8.b.** What remote digital services do you use? Please tick all that apply.

- ☐ vCreate Diaries
- ☐ vCreate Neuro
- ☐ MS Teams
- ☐ Badger Notes
- ☐ Other

**8.b.i.** If you selected Other, please specify:

9. When discharged from the neonatal unit, which infants do you **routinely** refer to community therapy services (PT, OT, SALT or Dietetics)? Please tick all that apply.

- ☐ We dont routinely refer to community therapy services but will do at a later date if required
- ☐ < 26 wks gestational age
- ☐ < 28 weeks gestational age
- ☐ < 30 weeks gestational age
- ☐ < 32 weeks gestational age
- ☐ HIE (cooled)
- ☐ < 1kg weight
- ☐ <1.25kg weight
- ☐ <1.5kg weight
- ☐ Clinical concerns with developmental progress
- ☐ Necrotising Enterocolitis (NEC)
- ☐ Congenital Heart Disease (CHD)
- ☐ Chronic Lung Disease (requiring home oxygen)
- ☐ Grade 3, 4 IVH or other brain injury identified by cranial ultrasound
- ☐ Congenital musculoskeletal abnormalities
- ☐ Suspected or confirmed genetic neuromuscular disease
- ☐ Other

9.a. If you selected Other, please specify:

# Neonatal Developmental Follow-up

**10.** Does your service offer specific appointments that focus on the developmental abilities and developmental progress of infants (developmental follow-up) after discharge home?

# Neonatal Developmental Follow-up

**11.** If your service does not offer specific developmental follow-up appointments (appointments that specifically focus on the developmental abilities and progress of infants), please let us know why.

- ☐ Service offered by another neonatal unit in your network
- ☐ Service offered by a paediatric (community) service)
- ☐ We are unable to offer this service because funding is not available
- ☐ Developmental assessment is undertaken as part of routine (general) follow-up (one appointment for both general and developmental follow-up)

# Neonatal Developmental Follow-up: Roles and Inclusion Criteria

**12.** What is the inclusion criteria for developmental follow-up in your service? Please tick all that apply

- ☐ < 28 weeks gestational age
- ☐ < 30 weeks gestational age
- ☐ < 32 weeks gestational age
- ☐ HIE (cooled)
- ☐ <1kg weight
- ☐ <1.25kg weight
- ☐ <1.5kg weight
- ☐ Clinical concerns with developmental abilities
- ☐ Brain lesion on imagine likely to be associated with developmental difficulty such as Grade III or IV IVH, PVL (any gestation)
- ☐ NEC
- ☐ Chronic lung disease
- ☐ Other

**12.a.** If you selected Other, please specify:

**12.b.** Do any of the following allied health professions **routinely** participate in your developmental follow-up service? Please tick all that apply.

- ☐ Physiotherapist
- ☐ Occupational Therapist
- ☐ Speech and Language Therapist
- ☐ Educational Psychologist
- ☐ Dietician



- ☐ Other
- ☐ We have no AHP input
- ☐ AHP's from the community team sometimes attend if we ask them to

12.b.i. If you selected Other, please specify:

13. Does one person have lead responsibility for developmental follow-up in your service?

- ☐ Yes
- ☐ No

13.a. Please specify the job role of the person responsible for developmental follow-up.

13.a.i. If you selected Other, please specify:

13.b. If no, please identify why.

- ☐ All consultants undertake developmental follow-up for their own patient/family caseload
- ☐ We refer all babies clinically considered to be 'high risk' to a community paediatrician
- ☐ We refer all babies born considered to be 'high risk' to therapy services
- ☐ Other

---

**13.b.i.** If you selected Other, please specify:

# Neonatal Developmental Follow-up: Tools, Measures and Timings

**14.** Which measures/tools does your service use to assess infant development during neonatal follow-up? Please tick all that apply.

- ☐ Alberta Infant Motor Scale (AIMS)
- ☐ Bayleys Screening Test
- ☐ Bayley Scales of Infant and Toddler Development II
- ☐ Bayley Scales of Infant and Toddler Development III
- ☐ Denver II Developmental Screening Test (DDST II)
- ☐ General Movements Assessment (GMA)
- ☐ Griffiths Scales of Child Development (Griffiths III)
- ☐ Hammersmith Infant Neurological Examination (HINE)
- ☐ Informal Assessment (based of Clinical Experience and Judgement)
- ☐ PARCA-R
- ☐ Schedule of Growing Skills
- ☐ Strengths and Difficulties Questionnaire (SDQ) (SDQ)
- ☐ Newborn Behavioural Observations (NBO)
- ☐ Neonatal Behavioural Assessment Scale (NBAS)
- ☐ Badger 2 year Questionnaire
- ☐ Other

**14.a.** If you selected Other, please specify:

**14.b.** Does your service offer standard time points for developmental follow-up?

**14.b.i.** If you do not offer standard time points for developmental follow-up, please indicate why.

**14.b.i.a.** If you selected Other, please specify:

**14.b.ii.** Please identify the **approximate timing** of **standard appointments** for developmental follow-up within your service. We will assume that additional appointments may be given between these time points if clinically indicated. Please tick all that apply. CGA - Corrected Gestational Age

- ☐ Around 0-2 months CGA
- ☐ Around 3-6 months CGA
- ☐ Around 7-10 months CGA
- ☐ Around 11-14 months CGA
- ☐ Around 15-19 months CGA
- ☐ Around 20-26 months CGA
- ☐ Around 36 months GCA
- ☐ Around 48 months CGA

## 2 and 4 year Developmental Follow-up

**15.** Do you offer a **face to face** developmental clinic appointment at 2 years of age for **infants born <30 weeks gestational age**? Please tick all that apply.

- ☐ Yes
- ☐ No

☐ Sometimes

**15.a.** If you **sometimes** offer a face to face developmental clinic appointment at **2 years** if age for **infants born < 30 weeks gestational age**, please identify why.

- ☐ The 2 year assessment is sometimes offered by another service within the network
- ☐ We refer to community paediatric colleagues for the 2 year follow up
- ☐ We offer a telephone appointment to assess the need to a face to face follow-up
- ☐ We send PARCA-R to assess the need for face to face follow-up
- ☐ Other

**15.a.i.** If you selected Other, please specify:

**15.b.** If you **don't** offer a **face to face** developmental clinic appointment at 2 years of age for infants born <30 weeks gestational age, please indicate why.

- ☐ The 2 year assessment is offered by another service within the network
- ☐ We refer to community paediatric colleagues for the 2 year follow up
- ☐ We offer a telephone appointment to assess the need to a face to face follow-up
- ☐ We send PARCA-R to assess the need for face to face follow-up
- ☐ Other

**15.b.i.** If you selected Other, please specify:

**15.c.** Which healthcare professionals are usually (routinely) present at the 2 year developmental follow-up appointment? Please tick all that apply.

- ☐ Neonatologist
- ☐ Community Paediatrician
- ☐ Other trained medical doctor
- ☐ Physiotherapist
- ☐ Dietician
- ☐ Speech and Language Therapist
- ☐ Educational Psychologist
- ☐ Occupational Therapist
- ☐ Other

**15.c.i.** If you selected Other, please specify:

**16.** Does your service offer a **face to face** developmental follow-up to infants born **<28 weeks gestational age to 4 years of age**?

- ☐ Yes
- ☐ No
- ☐ Sometimes
- ☐ We refer all infants born < 28 weeks gestational age to a community paediatrician for this service
- ☐ We undertake a telephone appointment to assess need for a face to face appointment

**16.a.** Which healthcare professionals are usually (routinely) present at the 4 year developmental follow-up appointment? Please tick all that apply.

**16.a.i.** If you selected Other, please specify:

**16.b.** Do you administer any of the following assessments at 4 years of age? Please tick all that apply

**16.b.i.** If you selected Other, please specify:

# Communication and Information Management

**17.** Does your service provide a written summary/letter to parents/caregivers regarding their infants developmental progress after the neonatal follow-up appointment?

- ☐ Yes
- ☐ No
- ☐ Sometimes

**18.** How do you communicate findings to other professionals involved in the child's care? Please tick all that apply

- ☐ Written letter
- ☐ Telephone
- ☐ Email
- ☐ Input to Badger Database
- ☐ No formal communication

**19.** Do you routinely record information regarding the child's abilities at the 2 year developmental appointment on the Badger Database?

- ☐ Yes
- ☐ No
- ☐ Sometimes

**19.a.** What are the main reasons for you not recording this information on Badger database? Please tick all that apply.

- ☐ Lack of time



- ☐ Separate service responsible for data entry
- ☐ Unable to access database
- ☐ No specific assessments used
- ☐ I don't think its important
- ☐ Fields are not available for the measures we use
- ☐ Someone else in my service inputs this information into Badger (another clinician or admin support)
- ☐ Other

**19.a.i.** If you selected Other, please specify:

**19.b.** Do you routinely record information regarding the child's abilities at the 4 year developmental appointment on the Badger Database?

- ☐ Yes
- ☐ No
- ☐ Sometimes
- ☐ We don't offer a 4 year developmental appointment

**19.b.i.** What are the main reasons for you not recording this information on Badger database? Please tick all that apply.

- ☐ Lack of time
- ☐ Separate service responsible for data entry
- ☐ Unable to access database
- ☐ We refer to my community paediatric colleagues for 4 year follow-up
- ☐ No specific assessments used
- ☐ We don't offer a 4 year follow-up appointment

- ☐ I don't think its important
- ☐ Fields are not available for the measures we use
- ☐ Someone else in my service inputs this information into Badger (another clinician or admin support)
- ☐ Other

# Covid-19 Impact on Neonatal Follow-up Services

**20.** Has the covid-19 pandemic had an impact on your neonatal follow-up service?

- ☐ Yes
- ☐ No

**20.a.** How was your service modified during this time? Please tick all that apply.

- ☐ Telephone clinics
- ☐ Virtual (video) clinics
- ☐ Email contact with families
- ☐ Face to Face with modifications (mask wearing, limitation on adults present, room cleaning etc)
- ☐ Changes in standardised assessment tools used
- ☐ Started using PARCA-R
- ☐ Continued to use PARCA-R
- ☐ Secure virtual technology used to transfer video/pictures (such as vCreate)
- ☐ Other

**20.a.i.** If you selected Other, please specify:

**20.b.** Which modifications to your service have remained? Please tick all that apply.

- ☐ Telephone clinics
- ☐ Virtual (video) clinics

- ☐ Email contact with families
- ☐ Face to Face with modifications (mask wearing, limitation on adults present, room cleaning etc)
- ☐ Changes in standardised assessment tools used
- ☐ Continued to use PARCA-R
- ☐ Secure virtual technology used to transfer pictures/video between families and staff (such as vCreate)

21. If there is something about your follow-up service that you wish to tell us, but hasn't been asked in one of the questions, please add your comment here.

22. Do you have any suggestions for improving neonatal developmental follow up services in your area? If you do, please add your comments here.

## Permissions

23. I consent to the **Lead ODN AHP Team, from my specific neonatal ODN** (if in Scotland, Wales or Northern Ireland, this will be the BANNFU AHP representative), to have access to the information I have provided in this survey.

24. I consent to the Community Paediatricians, AHPs and Nursing Team, **from my specific neonatal ODN** to have access to the information I have provided in this survey.

☐ Yes

☐ No

25. I consent to the **anonymised information** I have provided in this survey, being included in Claire Marcroft's PhD thesis. Claire is a Clinical Specialist Neonatal Physiotherapist working in Newcastle upon Tyne, Lead Physiothreapist for the Northern Neonatal Network and NIHR Clinical Doctoral Research Fellow at Newcastle University.

26. I consent to the **anonymised information** I have provided in this survey being reported in, and submitted to, a clinical peer reviewed journal as part of the full **anonymised** data set.

27. All participants can be entered into a raffle to win one of five £25 food hampers for their neonatal unit as a thank you for completing the survey. If you would like to be included, please enter your email contact details below.

Thank you

**Thank you for taking the time to complete this survey.  
Your participation is greatly appreciated.**

If you have any queries or feedback, then please contact

**Dr A Huertas-Ceballos**

**(Consultant Neonatologist and BANNFU President)**

E: a.huertas-ceballos@nhs.net

**Claire Marcroft (Clinical Specialist Neonatal Physiotherapist)**

E: c.marcroft@nhs.net

**Hilary Cruickshank (BAPM AHP Lead Clinician)**

E: hilary.cruickshank@nhslothian.scot.nhs.uk

---

## Key for selection options

**1 - What is your profession/job role? Please select from choices below.**

Neonatologist  
Neonatal Paediatrician  
Physiotherapist  
Paediatrician  
Occupational Therapist  
Nurse  
Speech and Language Therapist  
Psychologist  
Dietician  
Other

**2 - Which Neonatal Operational Delivery Network does your service relate to?  
Please select corresponding network.**

London

Northern  
Thames Valley and Wessex  
East Midlands  
Yorkshire and Humber  
East of England  
West Midlands  
South West  
Kent, Surrey and Sussex  
North West  
Wales  
Scotland  
Northern Ireland

**10 - Does your service offer specific appointments that focus on the developmental abilities and developmental progress of infants (developmental follow-up) after discharge home?**

Yes

No

Sometimes

Developmental assessment is undertaken as part of routine (general) follow-up

**13.a - Please specify the job role of the person responsible for developmental follow-up.**

Neonatologist

Community Paediatrician

Paediatrician

Specialist Trainee

Trust Doctor

Allied Health Professional

Nurse

Other

**14.b - Does your service offer standard time points for developmental follow-up?**

Yes

No

**16.a - Which healthcare professionals are usually (routinely) present at the 4 year developmental follow-up appointment? Please tick all that apply.**



Neonatologist  
Community Paediatrician  
Other trained medical doctor  
Physiotherapist  
Occupational Therapist  
Educational Psychologist  
Speech and Language Therapist  
Dietician  
Other

**16.b - Do you administer any of the following assessments at 4 years of age?**

**Please tick all that apply**

Strengths and Difficulties Questionnaire (SDQ)  
Wechsler Preschool and Primary Scale of Intelligence (WPPSI-IV)  
Other

**23 - I consent to the Lead ODN AHP Team, from my specific neonatal ODN (if in Scotland, Wales or Northern Ireland, this will be the BANNFU AHP representative), to have access to the information I have provided in this survey.**

Yes  
No

**25 - I consent to the anonymised information I have provided in this survey, being included in Claire Marcroft's PhD thesis. Claire is a Clinical Specialist Neonatal Physiotherapist working in Newcastle upon Tyne, Lead Physiotherapist for the Northern Neonatal Network and NIHR Clinical Doctoral Research Fellow at Newcastle University.**

Yes  
No

**26 - I consent to the anonymised information I have provided in this survey being reported in, and submitted to, a clinical peer reviewed journal as part of the full anonymised data set.**

Yes  
No
