# Supplementary material for: Neonatal neurodevelopmental follow-up in the UK: a survey of current practice and future recommendations
Source: Research Square preprint supplement (doi:10.21203/rs.3.rs-6464137/v1), 2025-05-07
Supplement: Supplementary file 1 [file 47b42a52ded10f1694544c96.docx]

**Appendix 1**

**NICE Guidelines (NG75) - Developmental follow-up of children and young people born preterm.**

Components of NICE guideline (NG72) used to develop and refine the survey.

| **Quality Statement** | **Quality Measures** | **Healthcare Professionals** | **Children, parents/carers** |
| --- | --- | --- | --- |
| Parents/carers have an agreed discharge plan | Evidence of arrangements for healthcare professionals to agree a discharge plan with parents or carers of a preterm baby before the baby is discharged from hospital. | Agree a discharge plan that includes information tailored to their individual circumstances.  Information should include:   - risk factors for developmental problems and follow-up arrangements. - universal services for assessing development through screening and surveillance. - whether their baby will be also be offered enhanced developmental support/surveillance - opportunities for peer support - signposting to local support services - talking to their health visitor or GP if they have any concerns.   Sharing written discharge plan with parents before they leave hospital | Agree a discharge plan that includes information tailored to their individual circumstances. It should cover risk factors for developmental problems, support available and follow-up arrangements. |
| Parents or carers of a preterm baby who is eligible for enhanced developmental support, are provided with a single point of contact for outreach care within the neonatal service. | Evidence of local arrangements for a neonatal outreach team with expertise in the development of babies born preterm to be available through a single point of contact | Are part of a neonatal outreach team that is available through a single point of contact. Able to answer questions about non-acute issues and support parents of preterm babies who are eligible for enhanced developmental support.  A single point of contact could be a telephone helpline, email address of other messaging service.  Criteria for enhanced developmental support can be found in the NICE guideline (NG72)  <https://www.nice.org.uk/guidance/ng72/chapter/Recommendations#enhanced-developmental-support-and-surveillance> | Know how to contact someone within the neonatal service to speak to if they have any worries about looking after their baby while their baby is followed up by neonatal services.  Enhanced developmental support includes additional advice and interventions with skilled professionals. The aim is to support families after discharge from hospital, respond to their concerns and reduce the impact of any developmental problems. |
| Children born preterm who are eligible for enhanced developmental surveillance have at least 2 follow-up appointments in the first year and an assessment at 2 years that focus on development. | Evidence of systems to record data on children born preterm and identify who needs enhanced support | Are either present at the 2 face to face follow up appointments in the first year or are available through referral for children born preterm who are eligible for enhanced developmental surveillance.  A neonatologist or paediatrician and at least 1 of occupational therapist, physiotherapist and speech and language therapist should be present at the assessment at 2 years.  At the 2 year of age assessment, they use screening tools to check for developmental problems and ensure that hearing and vision checks have been carried out. | Have at least 2 face-to-face follow-up appointments in their first year and an assessment at 2 years (corrected ages) with a doctor and another healthcare professional (such as physiotherapist, occupational therapist or speech and language therapist).  Parents/carers have a chance to talk about any concerns.  If there are any suspected problems, the healthcare professionals with investigate further and refer to local services. |
| Children born before 28+0 weeks' gestation have a developmental assessment at 4 years. | Evidence of systems to record data on children born preterm and identify those born before 28+0 weeks gestation | Educational psychologists, clinical psychologists and paediatricians with expertise in neurodevelopment attend a face to face developmental assessment as close to the child’s fourth birthday as possible.  Discuss with parents or carers whether they have any concerns.  Use assessments to check for social, attentional, emotional, and behavioural problems and to check developmental and IQ.  Check vision and hearing screening has been offered. | Children born before 28+0 weeks have a face-to-face assessment as close to their fourth birthday (uncorrected age) as possible with a doctor and a psychologist to check their development and see if they have any problems.  Parents or carers will have a chance to talk about any concerns. |
