# Supplementary material for: Neonatal neurodevelopmental follow-up in the UK: a survey of current practice and future recommendations
Source: Research Square preprint supplement (doi:10.21203/rs.3.rs-6464137/v1), 2025-05-07
Supplement: Supplementary file 2 [file 528844d7c9ca05c089b330b1.docx]

Supplementary Material

Supplementary Table 1: Free text responses to Question 5b. What are the reasons for not going through d/c summary with parents/caregivers prior to discharge home.

|  | **Free text responses** |
| --- | --- |
| 1 | Should be routine practice but we haven’t done it! |
| 2 | Due to lack of time |
| 3 | This isn't something that has been practice within our unit. Parents are encouraged to attend for ward-rounds and consultants would update families on a regular basis through their babies stay |
| 4 | I am unsure how often this happens |
| 5 | Time available and parental understanding. Parents are asked to review and comeback sometimes if they have questions. |
| 6 | This is what we aim for, and sometimes not possible to achieve due to staffing issues and cot pressures. However for high risk babies <30 weeks’ gestation, we aim to achieve this on most occasions. |
| 7 | Parents are regularly updated throughout their baby's stay in our unit. There is no separate conversation with them to explain the details in the discharge summary at the time of discharge. |
| 8 | Time |
| 9 | Anything on there has already been discussed the neonatal stay and d/c planning meeting would’ve been arranged if required. |
| 10 | Not always undertaken for straight forward cases. Lack of time can be a factor |
| 11 | This has not been considered. However, parents are regularly fully updated on the Unit. |
| 12 | This is the intention but due to timing of discharge/staffing there may be times when it does not happen |
| 13 | Depends on staff availability as doctors often cross cover with Paediatrics |
| 14 | Workload |
| 15 | Depends on the complexity of the stay. We do have a complex discharge coordinator who checks thing through with parents. |
| 16 | No historical precedent. Given letter however. |
| 17 | Time and staff availability. More likely to happen with higher risk / more complex infants |
| 18 | Should do but not always done. Always a follow up call from neonatal community nursing team |
| 19 | Time pressures and lack of staff, letters sometimes are delayed until after discharge. |
| 20 | We usually give it to the family to read, and then answer queries if there are any afterwards. |
| 21 | Given to the parents to read through, if they have any questions then answered by a member of staff |
| 22 | Children who have complex needs or are higher risk have a detailed discharge planning process undertaken. Lower risk infants have a verbal discussion as part of their discharge process but no formal requirement to go through discharge letter. Primary strain is available staff time |
| 23 | Enough time for the junior doctors and availability of the parents at the time of discharge |
| 24 | It is not a routine practice in the unit |
| 25 | Unsure but probably related to time pressures. |
| 26 | This is not always consistent due to staffing pressures |
| 27 | Time factors |
| 28 | not enough staff to do so nor parents that ask for this |
| 29 | Discharge summary only goes to the GP |
| 30 | Depends on day of discharge and availability of staff |
| 31 | Time staffing parental desire |
| 32 | Not current practice |
| 33 | Time/staffing pressures mean that sometimes discharge letters are done last minute not allowing sufficient time for them to then be checked prior to discharge |
| 34 | Sometimes the discharge summaries are finalised shortly before discharge and there is no time for staff and parents to sit down and go through the letter. But generally, the more preterm babies are discharged under the neonatal outreach nurse team, and parents can discuss the letter with them. |
| 35 | we aim to do this but occasionally due to unforeseen circumstances this isn't always possible |
| 36 | Capacity and lack of staff |
| 37 | Parents are given copy of the DC summary and asked to check it through for accuracy. If there are any problems, then a member of staff would be available to discuss. |
| 38 | Lack of available staff on duty |
| 39 | Staff shortages |
| 40 | Staffing and parental presence |
| 41 | Letters not done in a timely manner |
| 42 | Currently no policy to direct clinicians to do so, but we have a developmental discharge talk by AHPs and neonatal consultant will counsel the parents if there any abnormal brain imaging or important medical/developmental/social condition that might impact outcome, we are currently looking into discharge planning. |
| 43 | Sometimes the nurses or our discharge nurse goes through with parents, but this has not been made mandatory on the unit. We have recently identified this as an important part of the discharge plan and with support from our NCOT team, we have agreed to do this for all babies. |
| 44 | If prolonged course of admission and complex, follow up plan - yes |
| 45 | The aspiration is that there should be a discussion on every occasion - in reality, this very rarely happens. |
| 46 | Parents always get copies of clinic letters - not always discharge summaries - something we need to look at |
| 47 | Usually discharged back to local hospital or paediatric ward |
| 48 | Staffing issues- or language barriers |
| 49 | The journey the baby has taken, and medical input is discussed at the discharge planning meeting but the actual letter is not read through. |
| 50 | As an AHP not based on the SCBU, unable to say for sure if this does always happen. |
| 51 | This will happen for all complex babies who require ongoing follow-up. For these babies there has usually been a senior clinician led discharge planning meeting where a summary is given and onward plans discussed. If possible, this does happen with babies who had less complex courses, but this is somewhat less reliable. All families will have multiple consultant / senior clinician conversations / updates during their stay. |
| 52 | Parents are kept fully up-to-date and informed throughout their admission so don't always want/need discharge letter explaining. |
| 53 | Insufficient staffing |
| 54 | This is dependent on the consultant- not universal practice. |
| 55 | consultant dependant- not universal practice. |
| 56 | Process not in place. Time constraints, parents keen to get home when they are ready! |
| 57 | Time pressures on unit. |
| 58 | Depending on the complexity of the discharge summary or if the parents request. |
| 59 | not a routine practice, high number of BAME population where English is not first language |
| 60 | Something to aspire to but can’t guarantee it is discussed using the letter every time |
| 61 | Time constraints due to on-call shifts |
| 62 | Not always complete medical discharge Nursing staff give a one-page summary of medication and follow up appointment |
| 63 | Lack of time likely the main reason. Also, parents have many opportunities to ask questions during their stay regarding what has happened. |
| 64 | Complex discharges are usually discussed whilst others may not |
| 65 | I am the unit physio answering the questionnaire and I am unaware if the medical or nursing team do this. |
| 66 | Anything on there has already been discussed the neonatal stay and d/c planning meeting would’ve been arranged if required. |
| 67 | Not always undertaken for straight forward cases. Lack of time can be a factor |
| 68 | Not a routine practice, high number of BAME population where English is not first language |
